# Supplementary material
Source: HighWire-hosted journal article supplement (https://ajnr-sso.highwirestaging.com/highwire/filestream/52704/field_highwire_adjunct_files/0/15-00425.pdf)
Supplement: 15-00425.pdf [file 15-00425.pdf]

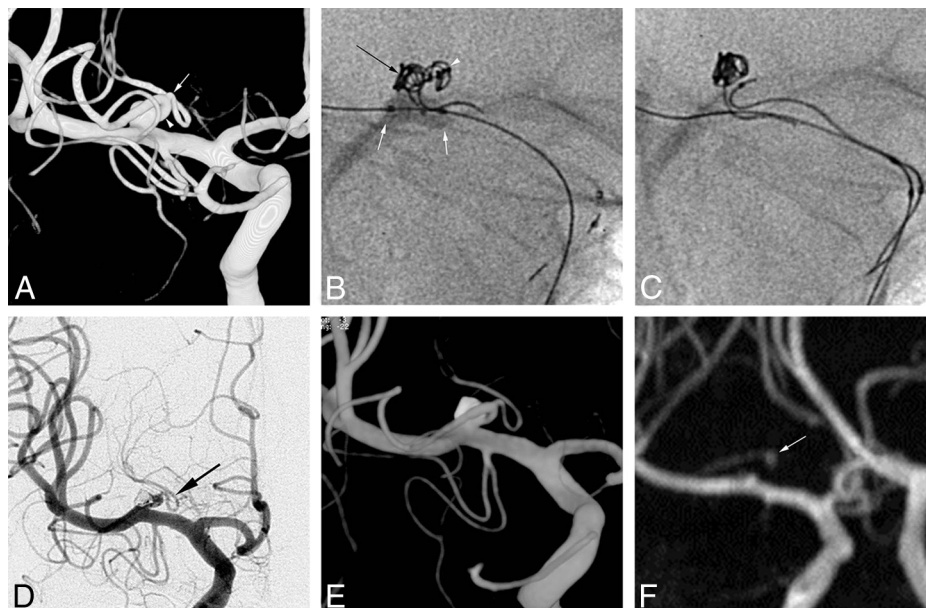

**ON-LINE FIG 1.** A 65-year-old woman with Hunt and Hess grade 2 subarachnoid hemorrhage. *A*, The 3D reconstruction image in working projection shows a wide-neck small aneurysm at the M1 portion of the right middle cerebral artery. Note that a frontal branch (*arrowhead*) from which the lateral lenticulostriate trunk (*arrow*) arises is incorporated into the aneurysm neck. *B*, A spot image shows the coiling by using a combined technique. The *arrowhead* indicates a protection coil, which is partially deployed at the origin of the incorporated frontal branch, *white arrows* indicate the inflated balloon, and the *black arrow* indicates the initial coil basket within the aneurysm sac. *C*, After deflation of the balloon and retrieval of the protection coil, the frame coil basket is stable. *D* and *E*, Final control angiogram (*D*) and the 3D reconstruction image (*E*) show complete occlusion of the aneurysm sac with the incorporated frontal branch (*arrow*) preserved. *F*, The 6-month follow-up MR angiogram shows no recurrence of the aneurysm and the patent frontal branch (*arrow*).
